# Supplementary material for: Extensive OMICS resource for Sf21 and Tni cell lines
Source: bioRxiv or medRxiv preprint supplement (doi:10.1101/2021.04.06.438574), 2021-04-06
Supplement: Supplementary file [file media-1.pdf]

## Supplementary tables

|                            | Contigs assembly only with PE reads | Assembly with PE and MP reads | Assembly with PE, MP and SLR reads | Assembly with PE, MP, SLR and ONT reads |
|----------------------------|-------------------------------------|-------------------------------|------------------------------------|-----------------------------------------|
| <b>Sf21 genome</b>         |                                     |                               |                                    |                                         |
| # sequences ( $\geq$ 1 Kb) | 47,866                              | 17,588                        | 11,871                             | 4,020                                   |
| Largest scaffold (bp)      | 264,592                             | 1,209,752                     | 2,608,367                          | 2,900,257                               |
| Total length (bp)          | 430,604,418                         | 477,599,629                   | 488,468,751                        | 463,041,686                             |
| N50 (bp)                   | 18,101                              | 140,626                       | 307,038                            | 364,523                                 |
| L50                        | 6,168                               | 843                           | 383                                | 315                                     |
| GC (%)                     | 36.20                               | 36.33                         | 38.59                              | 38.42                                   |
| # N's per 100 Kb           | 27.82                               | 3559.42                       | 776.82                             | 681.43                                  |
| <b>Tni genome</b>          |                                     |                               |                                    |                                         |
| # sequences ( $\geq$ 1 Kb) | 53,137                              | 22,485                        | 14,683                             | 2,954                                   |
| Largest scaffold (bp)      | 101,314                             | 595,205                       | 1,711,767                          | 1,722,548                               |
| Total length (bp)          | 355,056,269                         | 393,087,391                   | 407,374,447                        | 332,103,479                             |
| N50 (bp)                   | 8,666                               | 82,532                        | 252,810                            | 326,309                                 |
| L50                        | 9,637                               | 1,114                         | 395                                | 293                                     |
| GC (%)                     | 36.08                               | 35.82                         | 36.51                              | 36.30                                   |
| Number of N's per 100 Kb   | 57.75                               | 1183.12                       | 575.45                             | 499.33                                  |

**Table S1: Short summary of Sf21 and Tni *de novo* genome assemblies using progressively different types of reads.** The N50 value is defined as the sequence length of the shortest contig

at 50% of the total genome length. L50 value represent the smallest number of contigs to which their cumulative length represents half of genome size.

|                                                          | <b>Sf21</b>                                   | <b>Tni</b>                                          |
|----------------------------------------------------------|-----------------------------------------------|-----------------------------------------------------|
| <b>RNA-Seq data</b>                                      |                                               |                                                     |
| Total number of PE/SE reads                              | 91,741,494                                    | 240,178,919                                         |
| Number of PE/SE reads after adaptor and quality trimming | 86,754,674                                    | 164,941,193                                         |
| Number of PE/SE reads after duplicate removal            | 77,650,737<br>(#PE: 75,773,152 #SE:1,877,585) | 129,473,322<br>(#PE: 124,582,705<br>#SE: 4,890,617) |
| <b>Transcriptome assembly</b>                            |                                               |                                                     |
| Number of assembled transcripts                          | 28,339                                        | 57,600                                              |
| Number of assembled transcripts (>= 1000 bp)             | 9,948                                         | 21,534                                              |
| GC (%)                                                   | 41.31                                         | 42.93                                               |
| Total assembled bases                                    | 31,697,415                                    | 67,831,071                                          |
| N50 (bp)                                                 | 1,956                                         | 2,076                                               |
| Median transcript length (bp)                            | 611                                           | 648                                                 |
| Mean transcript length (bp)                              | 1,118.51                                      | 1,177.65                                            |
| Largest transcript (bp)                                  | 24,940                                        | 20,156                                              |
| # Full length transcripts (>= 80%)                       | 3,211                                         | 3,669                                               |
| Percentage of mapped RNAseq PE/SE reads                  | ~ 97% (proper pairs)                          | ~ 69% (proper pairs)                                |
| Number of transcripts after CD-HIT run (90% similarity)  | 24,992                                        | 41,041                                              |

**Table S2: Sf21 and Tni *de novo* transcriptome sequencing data and assembly features.**

This table presents the total number of sequencing paired-end (PE) reads and the number of processed reads after trimming and duplicate removal. The filtered reads were then used for transcriptome assembly. The shown metrics cover the number of assembled transcripts, the GC percent, the cumulative length of the assembly, the N50, the median, the mean and the

maximum length of the transcripts, the full-length transcript coverage and the number of RNAseq PE reads mapping back to the assembled sequences. Finally, the assembled transcripts were clustered, before the gene prediction step, using CD-HIT to remove duplications and clean up the dataset.

|                                                                           | <b>Sf21</b>         | <b>Tni</b>            |
|---------------------------------------------------------------------------|---------------------|-----------------------|
| <b>Main features</b>                                                      |                     |                       |
| Number of tRNAs                                                           | 1,233 (311 pseudos) | 1,965 (1,166 pseudos) |
| Number of ncRNAs                                                          | 396                 | 249                   |
| Number of repeats<br>(excluding low complexity<br>regions and satellites) | 431,477             | 390,271               |
| Number of<br>protein-coding genes                                         | 21,506              | 14,159                |
| <b>Exon statistics</b>                                                    |                     |                       |
| Exon count                                                                | 110,027             | 89,378                |
| Average number of<br>exons/gene                                           | ~5.12               | ~6.31                 |
| Exon space count (bp)                                                     | 30,421,075          | 20,631,338            |
| Average exon size (bp)                                                    | 276                 | 231                   |
| Median exon size (bp)                                                     | 160                 | 156                   |
| Minimum exon size (bp)                                                    | 14,440              | 14,890                |
| Maximum exon size (bp)                                                    | 3                   | 3                     |
| <b>Intron statistics</b>                                                  |                     |                       |
| Intron count                                                              | 88,521              | 75,220                |
| Number of introns/gene                                                    | ~4.12               | ~5.31                 |
| Intron space count (bp)                                                   | 94,576,984          | 77,902,387            |
| Average intron size (bp)                                                  | 1086                | 1036                  |

|                                        |             |             |
|----------------------------------------|-------------|-------------|
| Median intron size (bp)                | 649         | 597         |
| Minimum intron size (bp)               | 86,400      | 79,230      |
| Maximum intron size (bp)               | 21          | 22          |
| <b>Intergenic space statistics</b>     |             |             |
| Intergenic space count                 | 13,035      | 8,735       |
| Intergenic space size (bp)             | 353,235,779 | 248,980,732 |
| Average intergenic space distance (bp) | 31,190      | 33,600      |
| Median intergenic space distance (bp)  | 12,840      | 15,390      |
| Minimum intergenic space distance (bp) | 1           | 1           |
| Maximum intergenic space distance (bp) | 977,500     | 584,000     |

**Table S3. Genomics feature count.** This table represents the genomics feature characteristics and statistics for the Sf21 and Tni genomes.



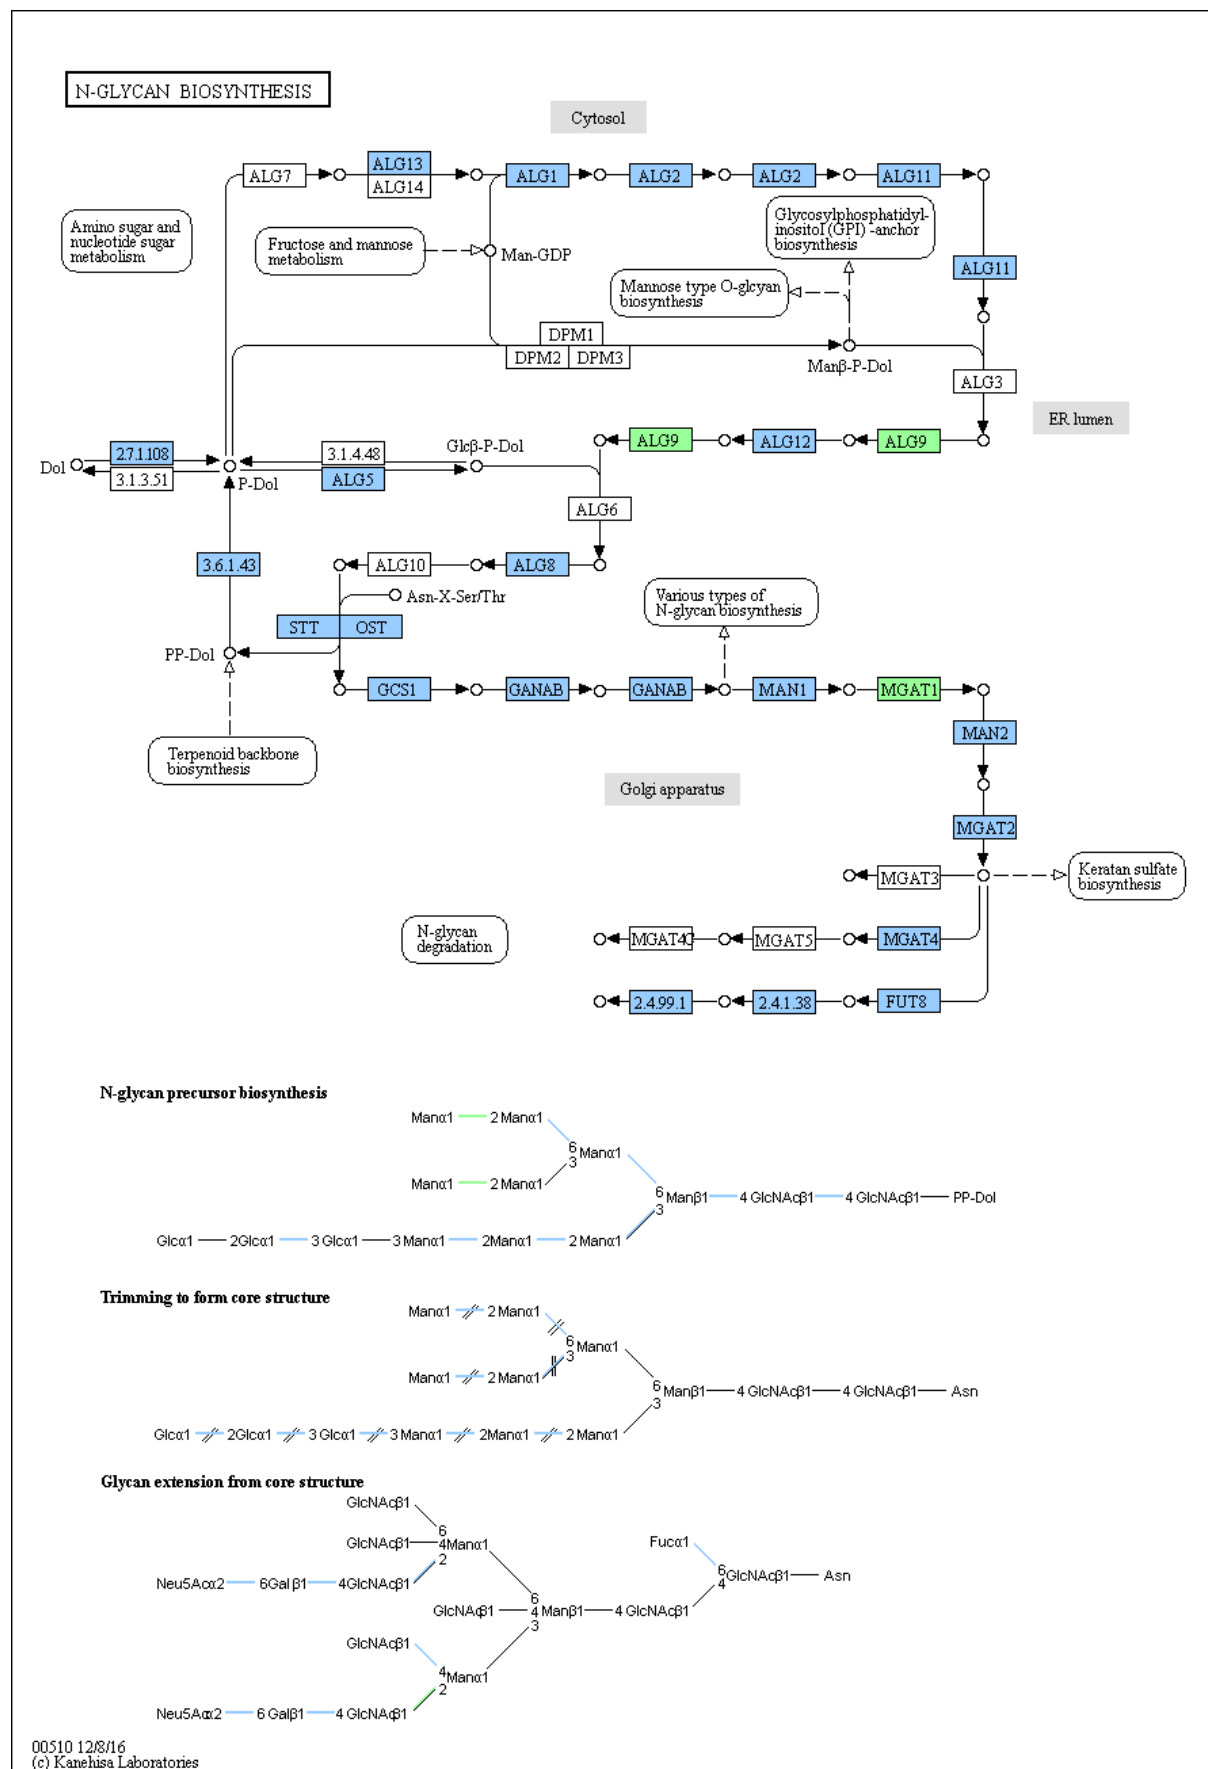

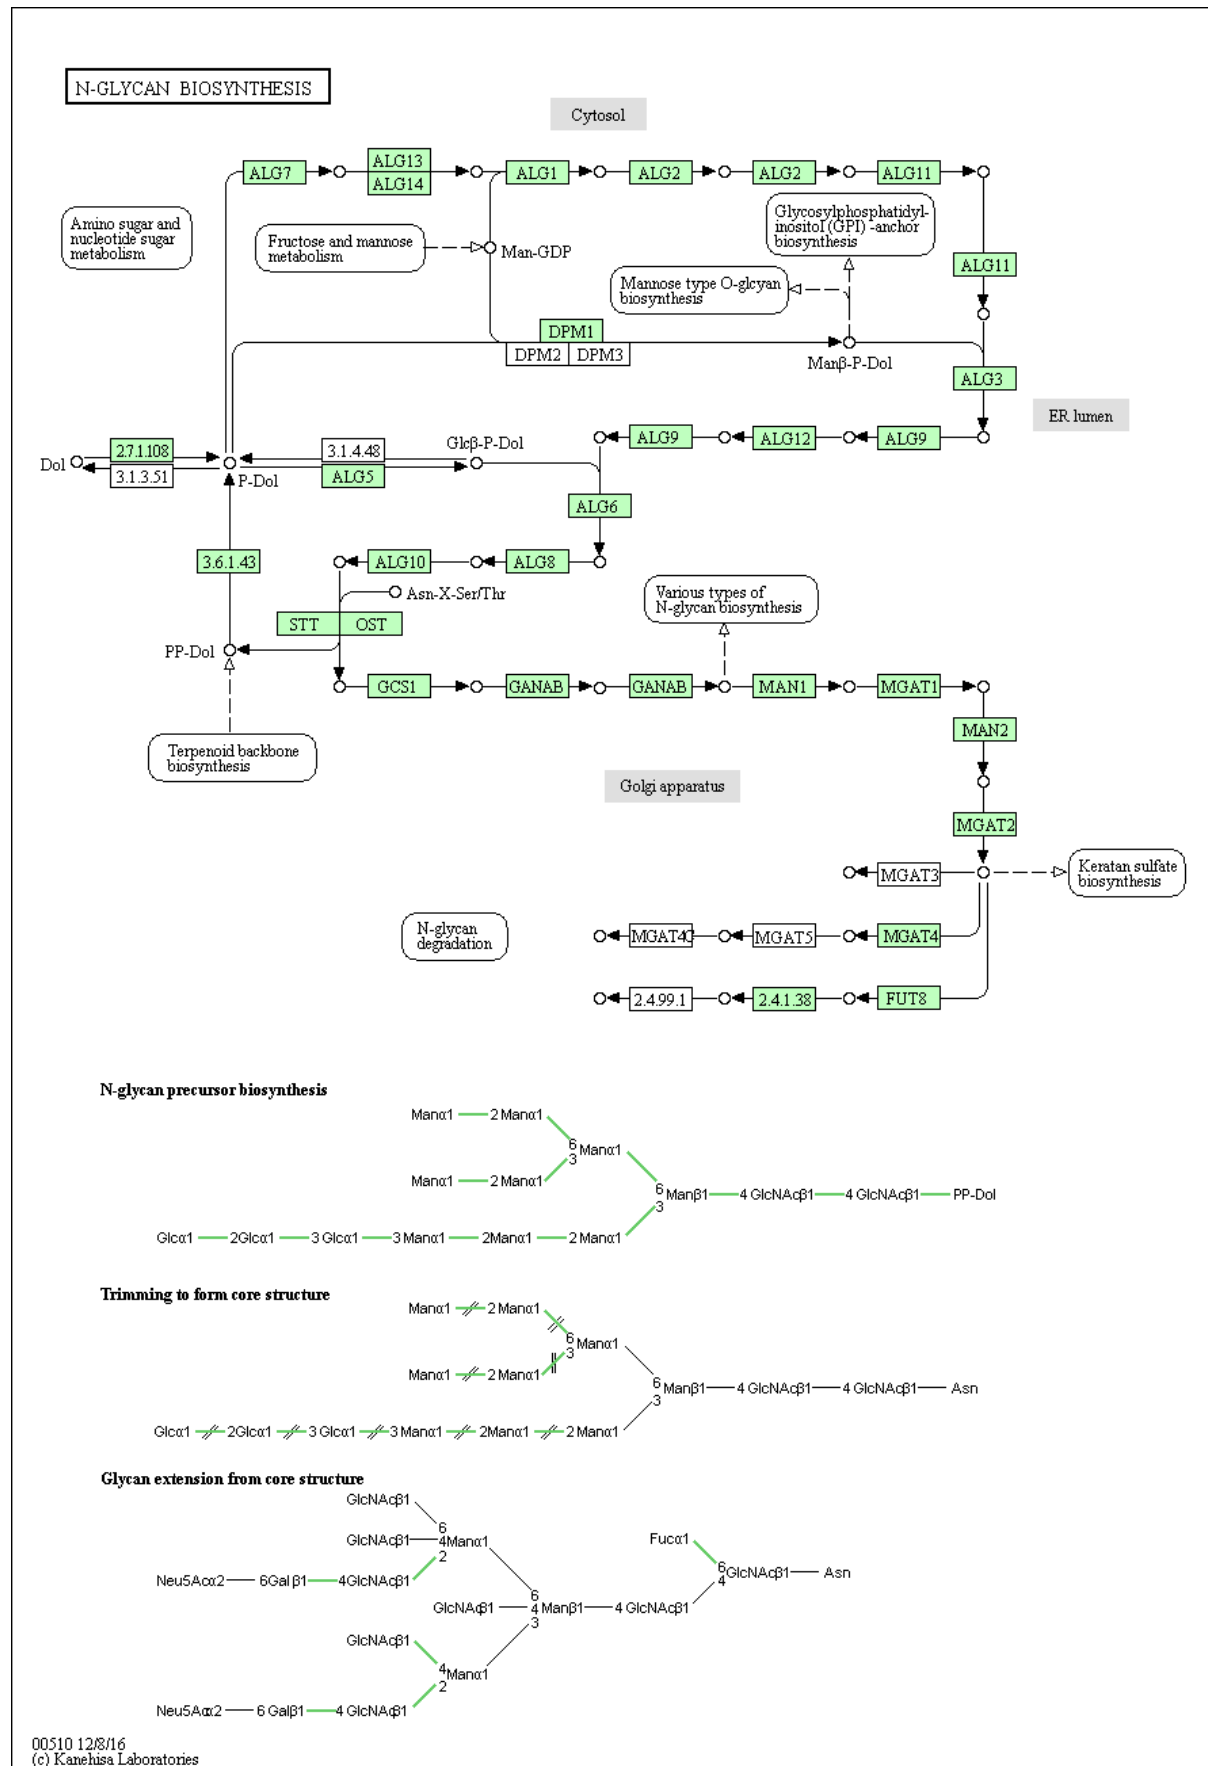

**Figure S1. N-glycan pathway.** N-glycan pathway representations for SF21 and Tni, as well as Bombyx Mori. Predicted genes, based on the genomic analysis, are marked with green and predicted and expressed, based on the genomic and transcriptomic analysis, are represented in blue.
